# Supplementary material
Source: PubMed Central journal article supplement (PMC10389563)
Supplement: NIHMS1877966-supplement-TableS1-S4.pdf [file NIHMS1877966-supplement-TableS1-S4.pdf]

## Lipids Uniquely Alter the Secondary Structure and Toxicity of Amyloid beta 1-42 Aggregates

Kiryl Zhaliuzka<sup>a</sup> and Dmitry Kurouski<sup>a,b,\*</sup>

a. Department of Biochemistry and Biophysics, Texas A&M University, College Station, Texas 77843, United States. Email: [dkurouski@tamu.edu](mailto:dkurouski@tamu.edu).

b. Department of Biomedical Engineering, Texas A&M University, College Station, Texas, 77843, United States

- Corresponding author:

Dmitry Kurouski; Email: [dkurouski@tamu.edu](mailto:dkurouski@tamu.edu)

Table S1. One-way ANOVA of significant differences for all testing groups. Tukey's HSD Post Hoc was performed for multiple comparison procedures and the statistical test, showed the following difference between tested groups:

| Group A                       | Group B                       | P-value  |      |          |      |          |      |          |      |
|-------------------------------|-------------------------------|----------|------|----------|------|----------|------|----------|------|
|                               |                               | 3 h      |      | 22 h     |      | 48 h     |      | 5d       |      |
| Ab                            | Ab:PC                         | 4.58E-02 | *    | 2.47E-02 | *    | 4.86E-01 | NS   | 3.51E-02 | *    |
| Ab                            | Ab:CL                         | 1.31E-04 | ***  | 6.82E-04 | ***  | 4.45E-03 | **   | 6.02E-01 | NS   |
| Ab                            | Ab:Chol:PC<br>(1:0.0PC:0.9PC) | 6.17E-07 | **** | 6.43E-06 | **** | 4.69E-02 | *    | 1.31E-01 | NS   |
| Ab                            | PC                            | 1.32E-04 | ***  | 3.92E-05 | **** | 1.63E-04 | ***  | 1.69E-07 | **** |
| Ab                            | CL                            | 6.52E-04 | ***  | 5.68E-05 | **** | 6.46E-05 | **** | 2.05E-07 | **** |
| Ab                            | Chol:PC<br>(0.05:0.95)        | 1.50E-03 | **   | 1.91E-04 | ***  | 3.89E-04 | ***  | 3.43E-07 | **** |
| Ab                            | Contr                         | 1.86E-04 | ***  | 2.01E-05 | **** | 8.64E-05 | **** | 5.27E-07 | **** |
| Ab:PC                         | Ab:CL                         | 9.88E-02 | NS   | 5.92E-01 | NS   | 2.01E-01 | NS   | 6.26E-01 | NS   |
| Ab:PC                         | Ab:Chol:PC<br>(1:0.0PC:0.9PC) | 1.54E-04 | ***  | 5.76E-03 | **   | 8.20E-01 | NS   | 9.95E-01 | NS   |
| Ab:PC                         | PC                            | 5.46E-07 | **** | 1.41E-07 | **** | 5.46E-06 | **** | 2.54E-09 | **** |
| Ab:PC                         | CL                            | 1.89E-06 | **** | 1.86E-07 | **** | 2.46E-06 | **** | 2.97E-09 | **** |
| Ab:PC                         | Chol:PC<br>(0.05:0.95)        | 3.63E-06 | **** | 4.66E-07 | **** | 1.16E-05 | **** | 4.47E-09 | **** |
| Ab:PC                         | Contr                         | 7.13E-07 | **** | 8.49E-08 | **** | 3.16E-06 | **** | 6.29E-09 | **** |
| Ab:CL                         | Ab:Chol:PC<br>(1:0.0PC:0.9PC) | 5.44E-02 | NS   | 1.86E-01 | NS   | 9.15E-01 | NS   | 9.52E-01 | NS   |
| Ab:CL                         | PC                            | 1.20E-08 | **** | 1.50E-08 | **** | 1.30E-07 | **** | 1.81E-08 | **** |
| Ab:CL                         | CL                            | 3.28E-08 | **** | 1.93E-08 | **** | 6.74E-08 | **** | 2.14E-08 | **** |
| Ab:CL                         | Chol:PC<br>(0.05:0.95)        | 5.55E-08 | **** | 4.34E-08 | **** | 2.42E-07 | **** | 3.37E-08 | **** |
| Ab:CL                         | Contr                         | 1.49E-08 | **** | 9.60E-09 | **** | 8.28E-08 | **** | 4.93E-08 | **** |
| Ab:Chol:PC<br>(1:0.0PC:0.9PC) | PC                            | 3.59E-10 | **** | 8.59E-10 | **** | 6.55E-07 | **** | 5.45E-09 | **** |
| Ab:Chol:PC<br>(1:0.0PC:0.9PC) | CL                            | 8.40E-10 | **** | 1.07E-09 | **** | 3.20E-07 | **** | 6.39E-09 | **** |
| Ab:Chol:PC<br>(1:0.0PC:0.9PC) | Chol:PC<br>(0.05:0.95)        | 1.30E-09 | **** | 2.14E-09 | **** | 1.29E-06 | **** | 9.79E-09 | **** |
| Ab:Chol:PC<br>(1:0.0PC:0.9PC) | Contr                         | 4.32E-10 | **** | 5.80E-10 | **** | 4.00E-07 | **** | 1.40E-08 | **** |
| PC                            | CL                            | 9.84E-01 | NS   | 1.00E+00 | NS   | 9.99E-01 | NS   | 1.00E+00 | NS   |
| PC                            | Chol:PC<br>(0.05:0.95)        | 8.80E-01 | NS   | 9.81E-01 | NS   | 1.00E+00 | NS   | 9.99E-01 | NS   |
| PC                            | Contr                         | 1.00E+00 | NS   | 1.00E+00 | NS   | 1.00E+00 | NS   | 9.86E-01 | NS   |
| CL                            | Chol:PC<br>(0.05:0.95)        | 1.00E+00 | NS   | 9.96E-01 | NS   | 9.67E-01 | NS   | 1.00E+00 | NS   |
| CL                            | Contr                         | 9.96E-01 | NS   | 9.98E-01 | NS   | 1.00E+00 | NS   | 9.95E-01 | NS   |
| Chol:PC<br>(0.05:0.95)        | Contr                         | 9.42E-01 | NS   | 8.82E-01 | NS   | 9.88E-01 | NS   | 1.00E+00 | NS   |

Table S2. One-way ANOVA of significant differences for all testing groups of A $\beta$  fibrils. Tukey's HSD Post Hoc was performed for multiple comparison procedures and the statistical test, showed the following difference between tested groups:

|                              | Group A                  | Group B                  | P-value  |      |          |      |
|------------------------------|--------------------------|--------------------------|----------|------|----------|------|
|                              |                          |                          | 22 h     |      | 48 h     |      |
| Anti-parallel $\beta$ -sheet | Ab                       | Ab:PC                    | 2.64E-04 | ***  | 3.20E-09 | **** |
|                              | Ab                       | Ab:Chol:PC (1:0.05:0.95) | -        | -    | 5.49E-07 | **** |
|                              | Ab                       | Ab:CL                    | -        | -    | 3.20E-09 | **** |
|                              | Ab:PC                    | Ab:Chol:PC (1:0.05:0.95) | -        | -    | 4.10E-06 | **** |
|                              | Ab:PC                    | Ab:CL                    | -        | -    | 1.00E+00 | NS   |
|                              | Ab:Chol:PC (1:0.05:0.95) | Ab:CL                    | -        | -    | 4.10E-06 | **** |
| Unordered                    | Ab                       | Ab:PC                    | 1.21E-04 | ***  | 1.45E-14 | **** |
|                              | Ab                       | Ab:Chol:PC (1:0.05:0.95) | -        | -    | 9.11E-10 | **** |
|                              | Ab                       | Ab:CL                    | -        | -    | 4.35E-05 | **** |
|                              | Ab:PC                    | Ab:Chol:PC (1:0.05:0.95) | -        | -    | 2.22E-08 | **** |
|                              | Ab:PC                    | Ab:CL                    | -        | -    | 1.76E-12 | **** |
|                              | Ab:Chol:PC (1:0.05:0.95) | Ab:CL                    | -        | -    | 3.10E-08 | **** |
| Parallel $\beta$ -sheet      | Ab                       | Ab:PC                    | 3.15E-06 | **** | 2.53E-08 | **** |
|                              | Ab                       | Ab:Chol:PC (1:0.05:0.95) | -        | -    | 2.23E-06 | **** |
|                              | Ab                       | Ab:CL                    | -        | -    | 5.41E-07 | **** |
|                              | Ab:PC                    | Ab:Chol:PC (1:0.05:0.95) | -        | -    | 2.67E-05 | **** |
|                              | Ab:PC                    | Ab:CL                    | -        | -    | 4.14E-11 | **** |
|                              | Ab:Chol:PC (1:0.05:0.95) | Ab:CL                    | -        | -    | 2.14E-09 | **** |

Table S3. One-way ANOVA of significant differences for all testing groups of samples accordingly to LDH test. Tukey's HSD Post Hoc was performed for multiple comparison procedures and the statistical test, showed the following difference between tested groups:

|                         | Group A                     | Group B                     | P-value  |      |          |      |          |      |          |      |
|-------------------------|-----------------------------|-----------------------------|----------|------|----------|------|----------|------|----------|------|
|                         |                             |                             | 3 h      |      | 22 h     |      | 48 h     |      | 5 d      |      |
| Antiparallel<br>β-sheet | Ab                          | Ab:PC                       | 1.09E-03 | **   | 3.46E-05 | **** | 1.48E-07 | **** | 7.80E-06 | **** |
|                         | Ab                          | Ab:Chol:PC<br>(1:0.05:0.95) | 2.68E-04 | ***  | 6.56E-09 | **** | 1.34E-07 | **** | 2.33E-01 | NS   |
|                         | Ab                          | Ab:CL                       | 8.31E-02 | NS   | 1.68E-06 | **** | 4.17E-02 | *    | 4.79E-04 | ***  |
|                         | Ab:PC                       | Ab:Chol:PC<br>(1:0.05:0.95) | 5.22E-01 | NS   | 3.11E-07 | **** | 7.08E-11 | **** | 2.34E-06 | **** |
|                         | Ab:PC                       | Ab:CL                       | 3.68E-02 | *    | 4.92E-03 | **   | 6.23E-07 | **** | 3.10E-03 | **   |
|                         | Ab:Chol:PC<br>(1:0.05:0.95) | Ab:CL                       | 5.61E-03 | **   | 3.50E-06 | **** | 3.72E-08 | **** | 7.51E-05 | **** |
| Unordered               | Ab                          | Ab:PC                       | 2.92E-03 | **   | 4.27E-05 | **** | 1.28E-09 | **** | 9.74E-05 | **** |
|                         | Ab                          | Ab:Chol:PC<br>(1:0.05:0.95) | 3.30E-08 | **** | 1.31E-05 | **** | 9.87E-08 | **** | 2.75E-05 | **** |
|                         | Ab                          | Ab:CL                       | 1.35E-06 | **** | 8.97E-04 | **** | 3.45E-02 | *    | 3.68E-03 | **   |
|                         | Ab:PC                       | Ab:Chol:PC<br>(1:0.05:0.95) | 4.79E-09 | **** | 3.85E-01 | NS   | 1.01E-05 | **** | 2.38E-07 | **** |
|                         | Ab:PC                       | Ab:CL                       | 1.23E-07 | **** | 3.56E-02 | *    | 3.61E-10 | **** | 3.01E-06 | **** |
|                         | Ab:Chol:PC<br>(1:0.05:0.95) | Ab:CL                       | 9.82E-05 | **** | 3.91E-03 | **   | 2.67E-08 | **** | 3.20E-03 | **   |
| Parallel-β-<br>sheet    | Ab                          | Ab:PC                       | 1.09E-03 | **   | 3.06E-07 | **** | 7.80E-06 | **** | 3.08E-07 | **** |
|                         | Ab                          | Ab:Chol:PC<br>(1:0.05:0.95) | 2.68E-04 | ***  | 2.90E-10 | **** | 4.50E-10 | **** | 1.83E-05 | **** |
|                         | Ab                          | Ab:CL                       | 8.31E-02 | NS   | 1.56E-07 | **** | 1.94E-04 | ***  | 5.30E-01 | NS   |
|                         | Ab:PC                       | Ab:Chol:PC<br>(1:0.05:0.95) | 5.22E-01 | NS   | 2.99E-07 | **** | 3.87E-08 | **** | 4.72E-09 | **** |
|                         | Ab:PC                       | Ab:CL                       | 3.68E-02 | *    | 4.23E-01 | NS   | 1.51E-07 | **** | 5.75E-07 | **** |
|                         | Ab:Chol:PC<br>(1:0.05:0.95) | Ab:CL                       | 5.61E-03 | **   | 6.15E-07 | **** | 1.98E-11 | **** | 7.38E-06 | **** |

Table S4. One-way ANOVA of significant differences for all testing groups of A $\beta$  oligomers. Tukey's HSD Post Hoc was performed for multiple comparison procedures and the statistical test, showed the following difference between tested groups:

| Group A                     | Group B                     | P-value  |      |          |      |          |      |          |      |
|-----------------------------|-----------------------------|----------|------|----------|------|----------|------|----------|------|
|                             |                             | 3 h      |      | 22 h     |      | 48 h     |      | 5 d      |      |
| Ab                          | Ab:PC                       | 5.39E-01 | NS   | 2.99E-07 | **** | 1.69E-09 | **** | 9.71E-07 | **** |
| Ab                          | Ab:Chol:PC<br>(1:0.05:0.95) | 2.28E-07 | **** | 8.52E-08 | **** | 1.04E-04 | ***  | 3.01E-01 | NS   |
| Ab                          | Ab:CL                       | 1.30E-09 | **** | 1.18E-10 | **** | 1.69E-10 | **** | 1.90E-05 | **** |
| Ab:PC                       | Ab:Chol:PC<br>(1:0.05:0.95) | 4.15E-07 | **** | 5.93E-02 | NS   | 6.41E-11 | **** | 2.57E-06 | **** |
| Ab:PC                       | Ab:CL                       | 2.13E-09 | **** | 1.15E-07 | **** | 1.08E-03 | **   | 1.17E-08 | **** |
| Ab:Chol:PC<br>(1:0.05:0.95) | Ab:CL                       | 3.05E-06 | **** | 4.18E-07 | **** | 4.82E-12 | **** | 5.68E-06 | **** |
